# Supplementary material for: Chlorine oxidation of VOCs at a semi-rural site in Beijing: Significant chlorine liberation from ClNO 2 and subsequent gas and particle phase Cl-VOC production
Source: Copernicus journal article supplement (doi:10.5194/acp-2018-9), 2018-01-16
Supplement: Supplementary file 1 [file acp-2018-9-supplement.pdf]

1 **Supplementary information for: Chlorine oxidation of VOCs at a semi-rural site in**  
 2 **Beijing: Significant chlorine liberation from CINO<sub>2</sub> and subsequent gas and particle**  
 3 **phase Cl-VOC production**

4

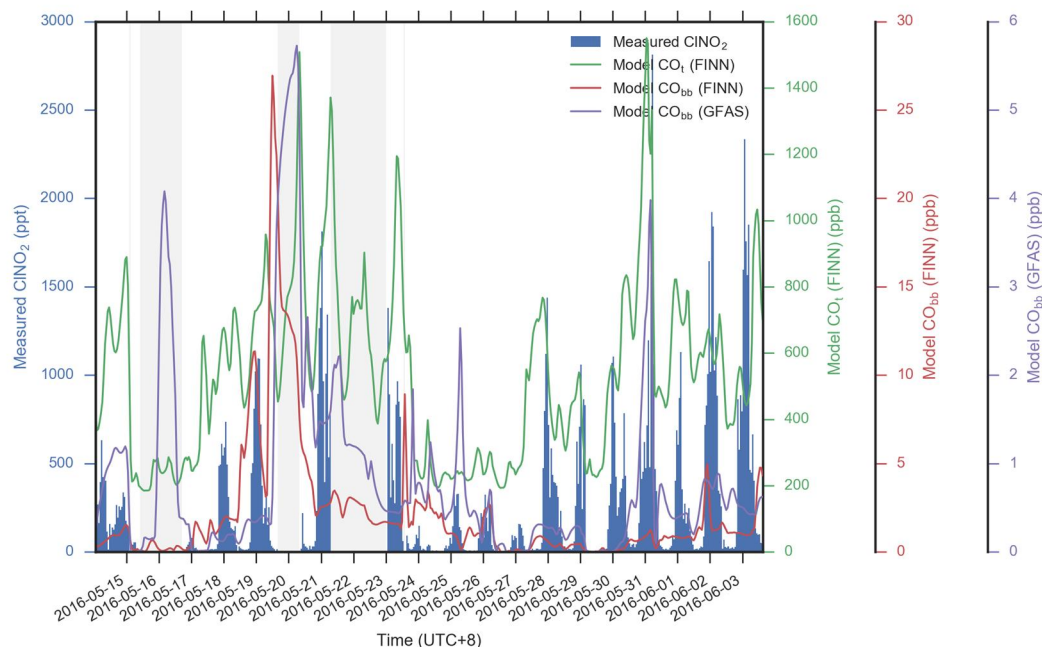

5

6 **Figure S1. Time series of measured CINO<sub>2</sub> concentrations, modelled CO<sub>t</sub> concentrations,**  
 7 **and modelled CO<sub>bb</sub> at the Changping site. CO<sub>bb</sub> is shown for both the model using the**  
 8 **FINN database and the GFAS database. Periods with missing measurement data are**  
 9 **shown in grey.**

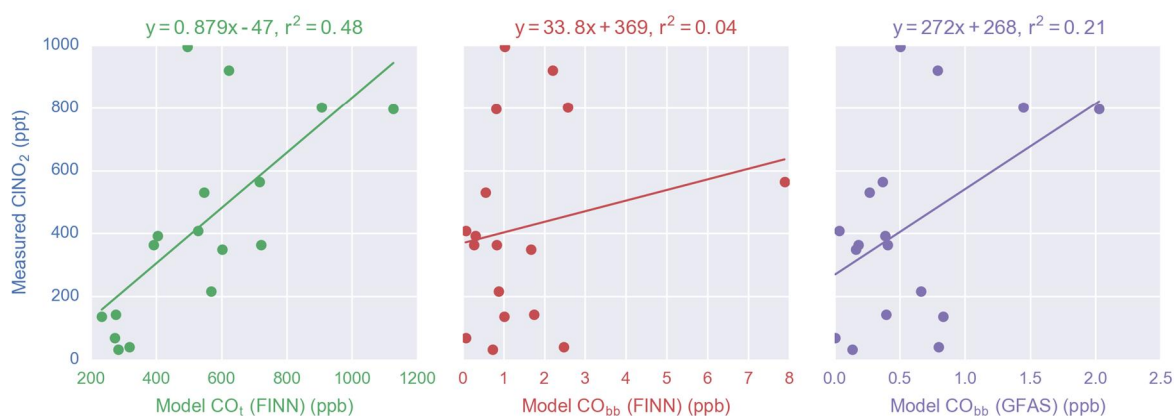

10

11 **Figure S2. Scatter plots of night-time averages of CINO<sub>2</sub> against corresponding averages**  
 12 **of CO<sub>t</sub>, CO<sub>bb</sub> in the FINN model, and CO<sub>bb</sub> in the GFAS model. Linear regressions for**

- 1 each of the comparisons gave the following  $r^2$  results:  $CO_t$  0.48,  $CO_{bb}$  FINN 0.04, and
- 2  $CO_{bb}$  GFAS 0.21.
- 3
